# Supplementary material for: The IL-33/ST2 pathway contributes to intestinal tumorigenesis in humans and mice
Source: PubMed Central journal article supplement — Oncoimmunology. 2015 Jun 26;5(1):e1062966. doi: 10.1080/2162402X.2015.1062966 (PMC4760343; doi:10.1080/2162402x.2015.1062966), 2015-06-26
Supplement: koni-05-01-1062966-s001.pdf [file koni-05-01-1062966-s001.pdf]

## 1 **Supplementary Materials and Methods**

### 2 **In silico analysis of IL33 transcript levels**

3 *IL33* transcript levels from Affymetrix probeset 209821\_at were extracted from Affymetrix  
4 GeneChip Human Genome U133 Plus 2.0 datasets and normalized using the GCRMA  
5 procedure. Data from CRC and normal large intestine tissue samples were obtained from the  
6 Gene Expression Omnibus (GEO) database (<http://www.ncbi.nlm.nih.gov/geo/>). Data from  
7 cancer cell lines were obtained from the cancer cell line encyclopedia resource.<sup>1</sup> Tumor and  
8 normal tissue expression values were compared using the Wilcoxon rank sum test  
9 implemented in R (<http://www.r-project.org/>).

### 10 **Grading of intestinal tumors in mice**

11 The following criteria were used for grading of mouse tumors; Grade 0: no tumor, healthy  
12 intestinal epithelium; Grade 1: adenoma with mild dysplasia (low grade); Grade 2: adenoma  
13 with moderate dysplasia (low grade); Grade 3: adenoma with severe dysplasia (high grade);  
14 Grade 4: adenoma with high grade dysplasia and infiltration of the *lamina propria*  
15 (intramucosal neoplasia); Grade 5: invasive carcinoma.

### 16 **Immunohistochemistry of mouse tissue**

17 Mouse tissue was fixed in 4% formaldehyde for 24 hours prior to dehydration and paraffin  
18 embedding. Antigen retrieval for IL-33 for IHC was performed with treatment in a 1 mM Tris  
19 / 1 mM EDTA pH 9.0 solution for 18 minutes. After an endogenous peroxidase block (5  
20 minutes at room temperature with 3% H<sub>2</sub>O<sub>2</sub> and 15 mM sodium azide), primary goat anti-  
21 mouse IL-33 (R&D systems, AF3626) was used at a dilution of 1:100. A secondary rabbit  
22 anti-goat antibody (Dako, E0466) was used at a dilution of 1:100. A tertiary horseradish

23 peroxidase (HRP)-linked anti-rabbit antibody (Dako, K400311) was used undiluted to detect  
24 positive cells.

### 25 **Tumor induction protocol for gene expression studies over time**

26 Gene expression studies over time (Supplementary Figure 4A and B) were performed in a  
27 different facility. Because of changes in commensal communities between mouse facilities, a  
28 different protocol of AOM/DSS was applied to yield robust tumor formation in C57BL/6J  
29 mice, which was comparable to the one observed in the other mouse facility. In brief, animals  
30 were injected with AOM. After 5 days, mice were given one cycle of 2% DSS for 5 days,  
31 followed by 16 days of water. In the next two feeding cycles, DSS was increased to 2.7%.  
32 Animals were analyzed on days 20, 60 and 90.

### 33 **Generation of bone marrow chimeras**

34 Mice were irradiated with two doses of 650 cGy at an interval of 4 hours. Mice were then  
35 adoptively transfused with  $1 \times 10^7$  bone marrow (BM) cells from donor animals and treated  
36 with the antibiotics Bactrim (Roche) and Baytril (Bayer) in the drinking water for two weeks.  
37 Following antibiotic treatment, BM recipient mice were co-housed with untreated WT mice  
38 for 4 weeks prior to DSS or AOM/DSS treatment to accelerate the re-colonization of the  
39 intestinal microflora. Also, soiled bedding was exchanged between cages at least weekly for  
40 matching of commensal communities between experimental groups.

### 41 **ELISA**

42 A sandwich ELISA for IL-6 was performed on 96-flat bottom Nunc MaxiSorp® plates  
43 (eBioscience, 44-2404) using a purified anti-mouse IL-6 capture antibody (eBioscience, 14-  
44 7061-81). A second biotinylated anti-mouse IL-6 antibody (eBioscience, 13-7062) followed  
45 by addition of Avidin HRP (eBioscience, 13-7062-81) were used for detection. Following

46 addition of Substrate Reagent Pack (R&D Systems, DY999) and addition of 1 M sulfuric acid  
47 used to stop color development, signals were analyzed on a SpectraMax M2e device (Bucher  
48 Biotec).

#### 49 **Quantitative PCR analysis**

50 RNA from mouse tissue or cells was purified using TRI-reagent (Sigma, T9424) or TRIzol  
51 (Life Technologies, 15596-026). Transcription of cDNA from RNA was performed with M-  
52 MLV Reverse Transcriptase (Promega, M1701). FastStart SYBR Green Master (Roche,  
53 04673492001) and commercial primers (Qiagen) were used to detect *Arg1* (QT00134288),  
54 *Ccl2* (QT00167832), *Il6* (QT00098875), *Tnf* (QT00104006), *Il11* (QT00122122), *Il1b*  
55 (QT01048355), *Il17a* (QT00103278) and *Gapdh* (QT01658692) transcript levels.  
56 Quantification of 16S rRNA was performed as previously described.<sup>2</sup> Alternatively, PCR  
57 reactions were run using the QuantiTect Probe RT-PCR Kit (Qiagen, 204443) and TaqMan  
58 Inventoried Gene Expression Arrays (Life Technologies, 4331182) to detect *Il33*  
59 (Mm00505403\_m1), *Cxcl1* (Mm00433859\_m1), *Cxcl2* (Mm00436450\_m1), *Il6*  
60 (Mm99999064\_m1), *Mpo* (Mm00447886\_m1), *Nos2* (Mm00440502\_m1), or human or  
61 mouse *St2* (Hs00545033\_m1 or Mm00516117\_m1) transcript levels and 18S rRNA  
62 (4319413E). Reactions were run on a StepOnePlus Real-Time PCR System (Life  
63 Technologies) or on an ABI 7500 Real-Time PCR System (Life Technologies). Expression  
64 levels of genes were normalized to *Gapdh* mRNA or 18S rRNA and tumor-free / unstimulated  
65 versus tumor / stimulated tissues were compared.

#### 66 **Human intestinal epithelial cell lines**

67 The human intestinal epithelial cell lines Caco-2, COLO 205, DLD-1, HT-29, LS 174T, LS  
68 180, SW480, SW620 and T84 were obtained from ATCC.

69 **STAT3 phosphorylation in human intestinal tumor cell lines**

70 HT-29 and Caco-2 cells were resuspended in MEM containing 0.5% FCS, Glutamax, and  
71 Penicillin/Streptomycin at  $4 \times 10^6$  cells/ml, and equilibrated at 37°C in a water bath for 40  
72 minutes. IL-6 was added at the indicated concentrations for 15 minutes, paraformaldehyde  
73 was added to a final concentration of 2% and plates were returned to 37°C for another 15  
74 minutes. Cells were pelleted, resuspended in ice-cold 90% methanol, and incubated at -20°C  
75 for at least 30 minutes. Cells were washed three times in FACS buffer (FB, PBS containing  
76 2% FCS, 10 mM EDTA). Mouse-anti-human-pSTAT3 (pY705)-Alexa647, (BD Biosciences,  
77 557815) was added at room temperature for 45 minutes. Cells were washed and resuspended  
78 in FB and analyzed on FACS Canto II (BD Biosciences) using the Diva software. Data were  
79 analyzed using FlowJo (Tree Star Inc.).

80 **Proliferation of human intestinal tumor cell lines**

81  $10^4$  Caco-2, HT-29 and LS 174T cells were seeded in their respective culture media in 96-  
82 well flat-bottom plates (75µl/well), adhered for 5 hours and incubated for 24 hours with the  
83 indicated concentrations of IL-33. Cell proliferation was measured using a colorimetric,  
84 BrdU-based cell proliferation ELISA (Roche, 11647229001).

85 **Determination of disease activity score**

86 The following criteria were used for determining the disease activity score, by adding for each  
87 mouse the value of these three distinct parameters; Weight loss compared with initial weight  
88 (Score 0, <1% weight loss; Score 1, 1-5% weight loss; Score 2, 5-15% weight loss; Score 4,  
89 15-20% weight loss); Stool consistency (Score 0, normal stool; Score 2, loose stool; Score 4,  
90 diarrhea); Blood loss (Score 0, negative; Score 2, positive).

91 **Mouse endoscopy**

92 Colonoscopy was performed on isoflurane-anesthetized mice using a straight-type rigid  
93 miniature endoscope with a high resolution Karl Storz IMAGE1™ System (Storz).

94

95 **References**

96 1. Barretina J, Caponigro G, Stransky N, Venkatesan K, Margolin AA, Kim S, Wilson  
97 CJ, Lehar J, Kryukov GV, Sonkin D, et al. The Cancer Cell Line Encyclopedia enables  
98 predictive modelling of anticancer drug sensitivity. Nature 2012; 483:603-7.

99 2. Croswell A, Amir E, Tegatz P, Barman M, Salzman NH. Prolonged impact of  
100 antibiotics on intestinal microbial ecology and susceptibility to enteric Salmonella infection.  
101 Infect Immun 2009; 77:2741-53.

102

103

104 **Supplementary Figures**

105 **Supplementary Figure 1**

106

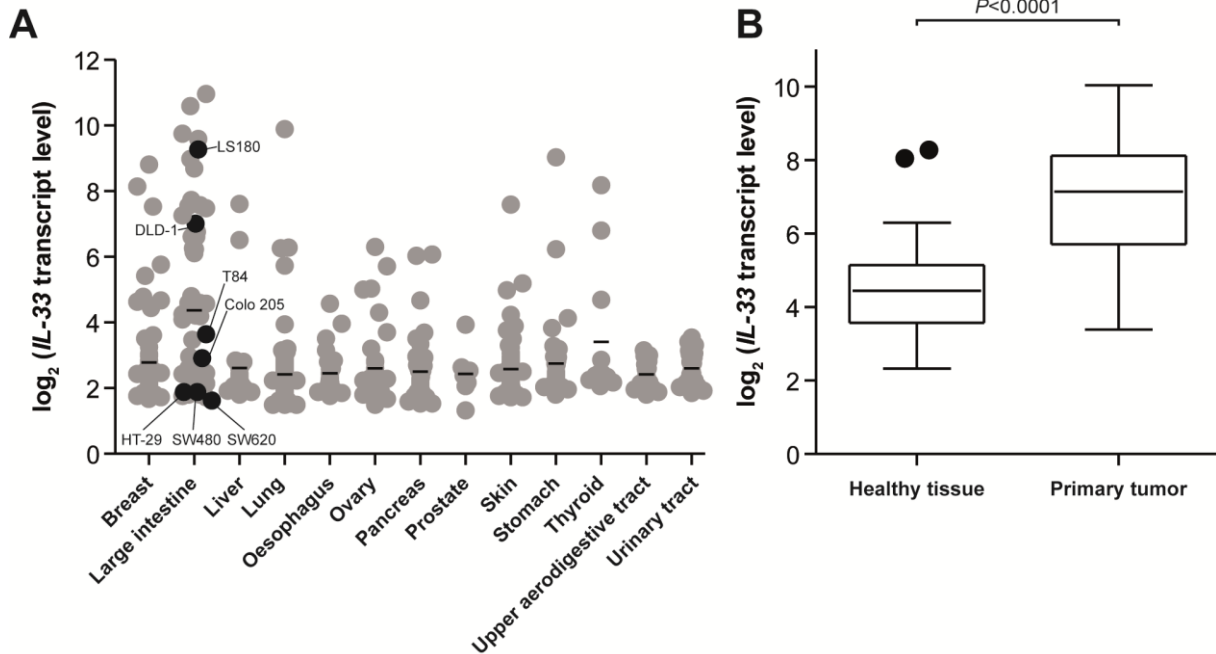

107

108 Cancer cell lines and primary tumors from the large intestine show increased *IL33*

109 transcription. (A) *IL33* transcript levels in established cancer cell lines from indicated tissues.

110 *IL33* transcripts in the large intestine are significantly upregulated compared to lung, pancreas

111 ( $P < 0.001$ ), breast, liver, esophagus, ovary and skin ( $P < 0.01$ ). Means and identities of selected

112 CRC cell lines are indicated. (B) Relative expression levels of *IL33* are increased in primary

113 tumor samples ( $n = 81$ ) compared with normal large intestine tissue samples ( $n = 24$ ). Data were

114 obtained from the GEO dataset GSE20916 (<http://www.ncbi.nlm.nih.gov/pubmed/20957034>).

115 A similar observation was made upon analysis of two other independent GEO datasets (data

116 not shown). Statistical analyses were performed using (A) Kruskal-Wallis analysis with

117 Dunn's post-test comparing cells from the large intestine against all other cell lines and (B)

118 Student *t* test.

119

120 **Supplementary Figure 2**

121

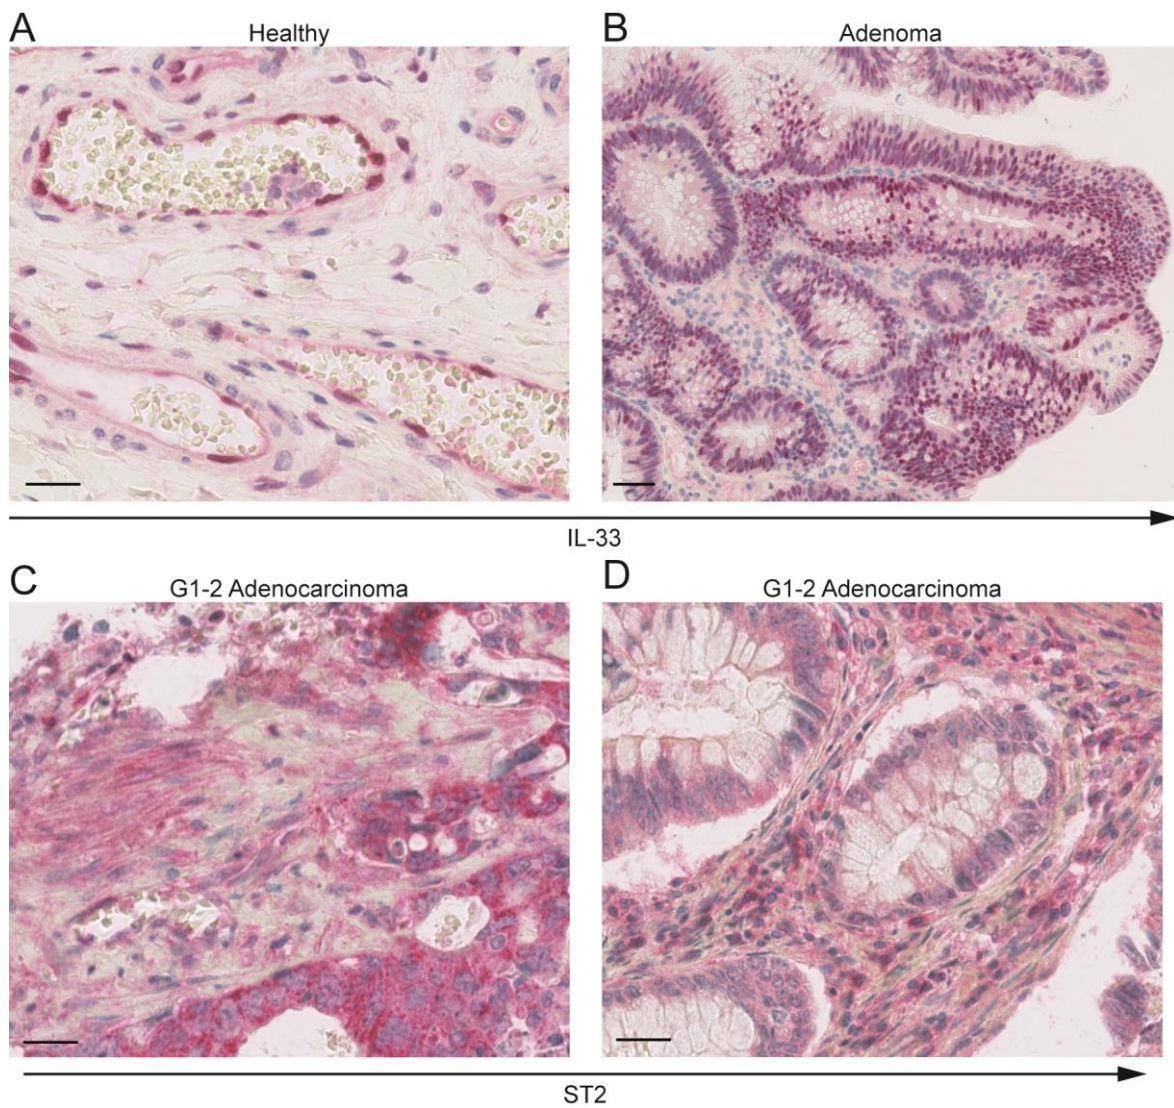

122

123 IL-33 and ST2 expression in human colon. (A) Endothelial cells in the healthy mucosa  
124 express IL-33. (B) IECs in adenomas express IL-33. (C) ST2 was also expressed by  
125 myofibroblasts, endothelial cells and infiltrating immune cells. (D) ST2 expression on  
126 infiltrating immune cells. Scale bars: (A, C, D) 25  $\mu\text{m}$  or (B) 50  $\mu\text{m}$ .

127



128 **Supplementary Figure 3**

129

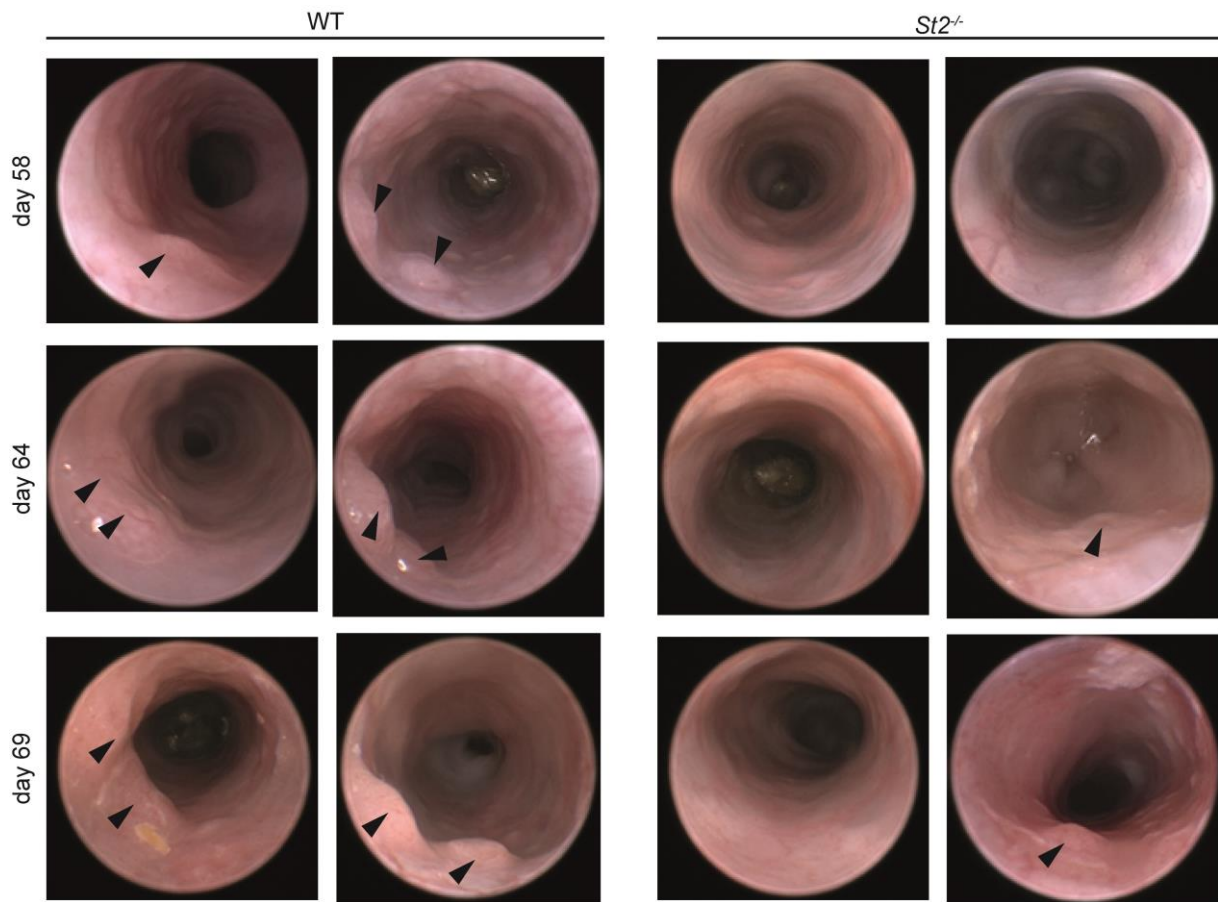

130

131

132 Disruption of IL-33/ST2 signaling delays the development of CRC in the AOM/DSS model.

133 Tumor development was assessed by miniature endoscopy. Upper and corresponding lower

134 panels show the same locations in the colons of the same animals on the indicated days after

135 the start of AOM/DSS treatment. Representative endoscopic pictures are shown for two out of

136 five mice per group. Tumors are indicated with arrowheads.

137

138 **Supplementary Figure 4**

139

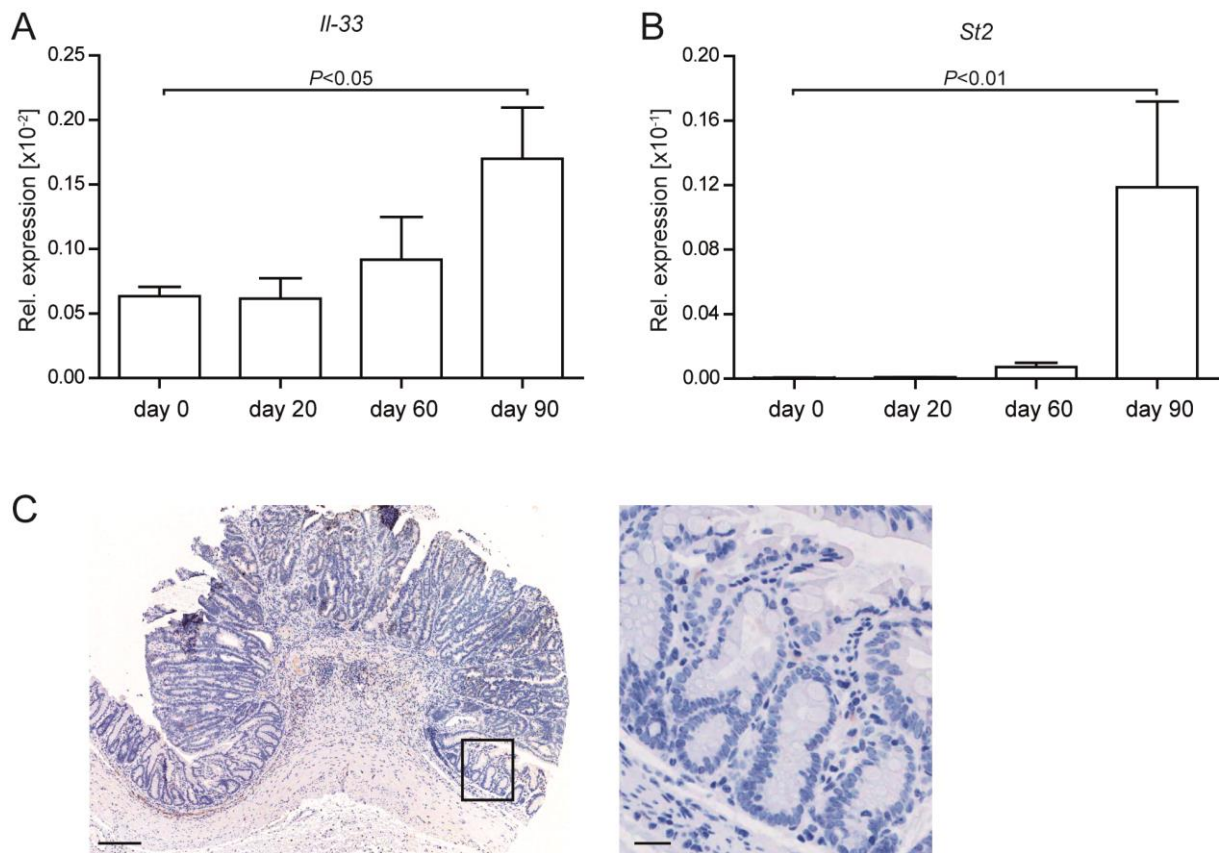

140

141

142 Expression levels of the IL-33/ST2 pathway during AOM/DSS treatment. Colonic (A) *Il33*  
143 and (B) *St2* transcript levels become progressively upregulated in AOM/DSS-treated WT  
144 mice. Data represent means  $\pm$  SEM;  $n=5$  samples per time point. (C) IHC for IL-33 of WT  
145 colorectal tumor showing the same tissue sample as in Figure 3. Inlay shows tumor-free  
146 tissue. Scale bars: overview: 200  $\mu\text{m}$ ; inlay 25  $\mu\text{m}$ . Statistical analyses were performed using  
147 (A) Student *t* test or (B) Mann-Whitney test.

148

149 **Supplementary Figure 5**

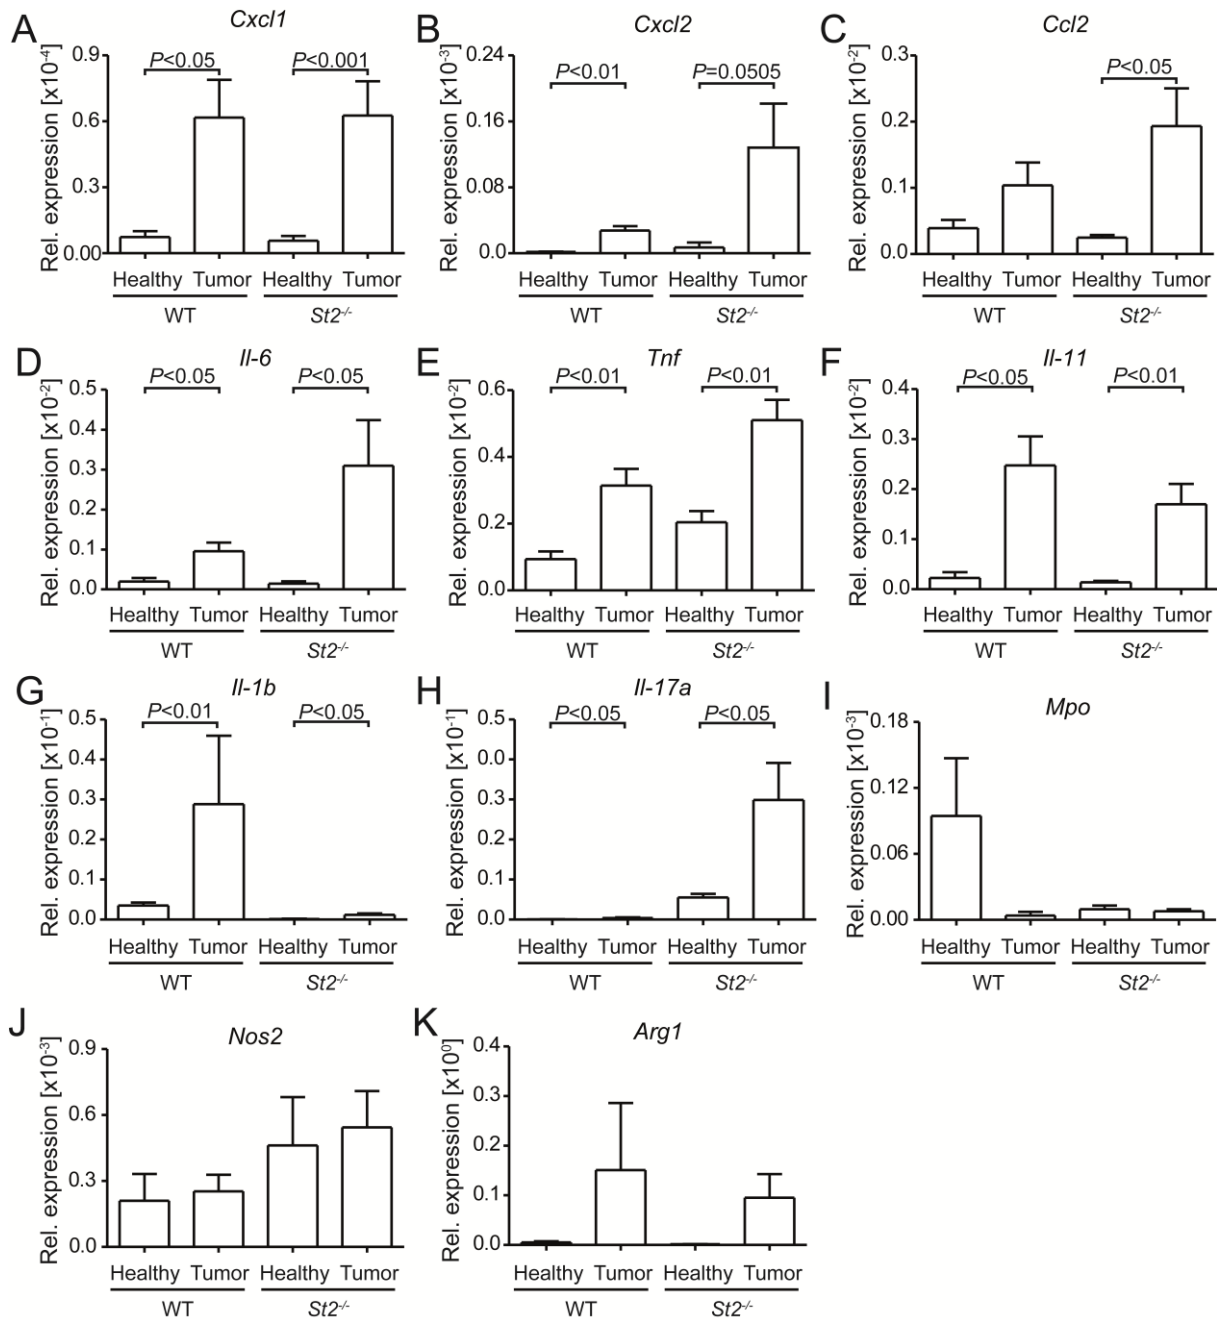

150

151

152 Differential gene expression in tumor versus adjacent tumor-free tissue. Transcript levels  
 153 were quantified in WT versus *St2*<sup>-/-</sup> mice for (A) *Cxcl1*, (B) *Cxcl2*, (C) *Ccl2*, (D) *Il6*, (E) *Tnf*,  
 154 (F) *Il11*, (G) *Il1b* and (H) *Il17a*, (I) *Mpo*, (J) *Nos2*, (K) *Arg1*. Data represent means  $\pm$  SEM;  
 155  $n=9$  samples per group. Statistical analyses were performed using paired *t* test.

156 **Supplementary Figure 6**

157

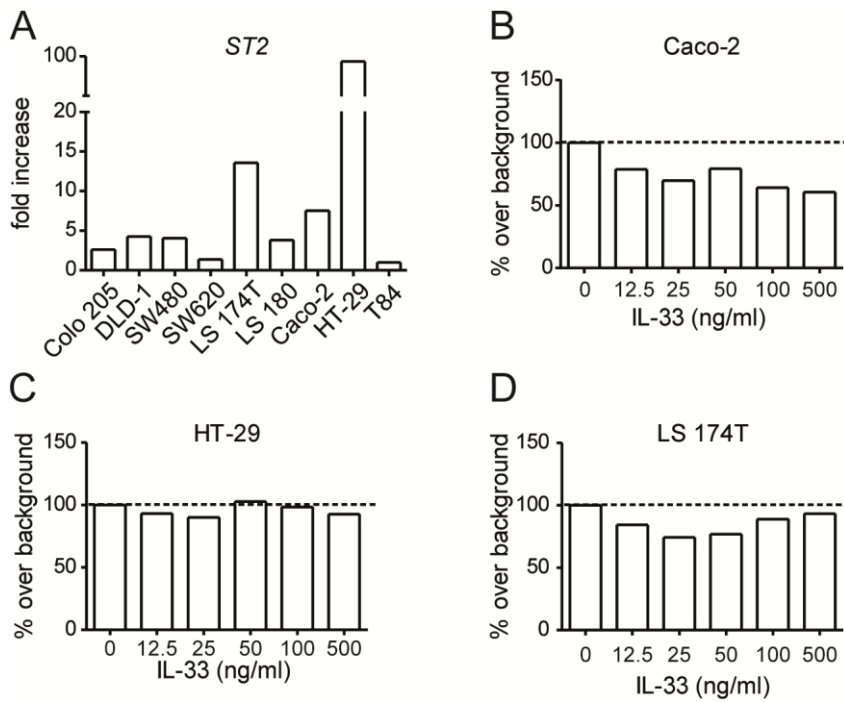

158

159

160 Activation of the IL-33/ST2 pathway does not promote IEC proliferation. (A) *ST2* transcript  
161 levels in the indicated human CRC cell lines are represented relatively to *ST2* expression in  
162 T84 cells. IL-33 did not stimulate proliferation of (B) HT-29, (C) Caco-2 cells and (D) LS  
163 174T cells. Data represent means of experimental duplicates.

164

165 **Supplementary Figure 7**

166

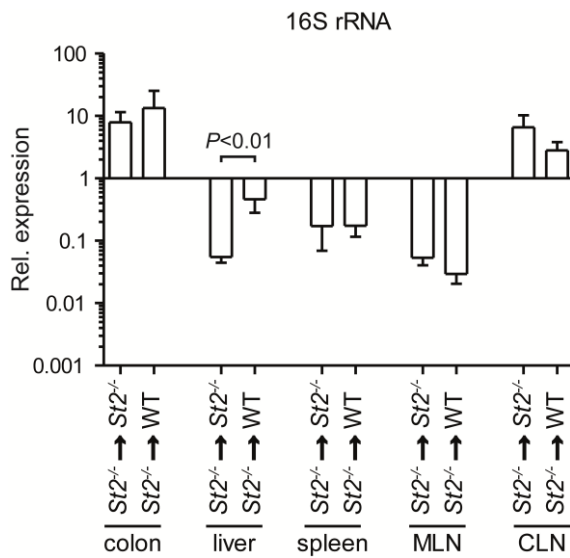

167

168

169 Function of the IL-33/ST2 pathway in radio-resistant cells. Indicated groups of BM chimeras  
170 were treated with DSS. Presence of bacteria in indicated organs was assessed by quantifying  
171 16S rRNA in the indicated organs. Data represent means  $\pm$  SEM and show one representative  
172 from two independent experiments;  $n=5-9$  mice per group. MLN, mesenteric lymph nodes.  
173 Statistical analysis was performed using Mann-Whitney test.

174

175 **Supplementary Figure 8**

176

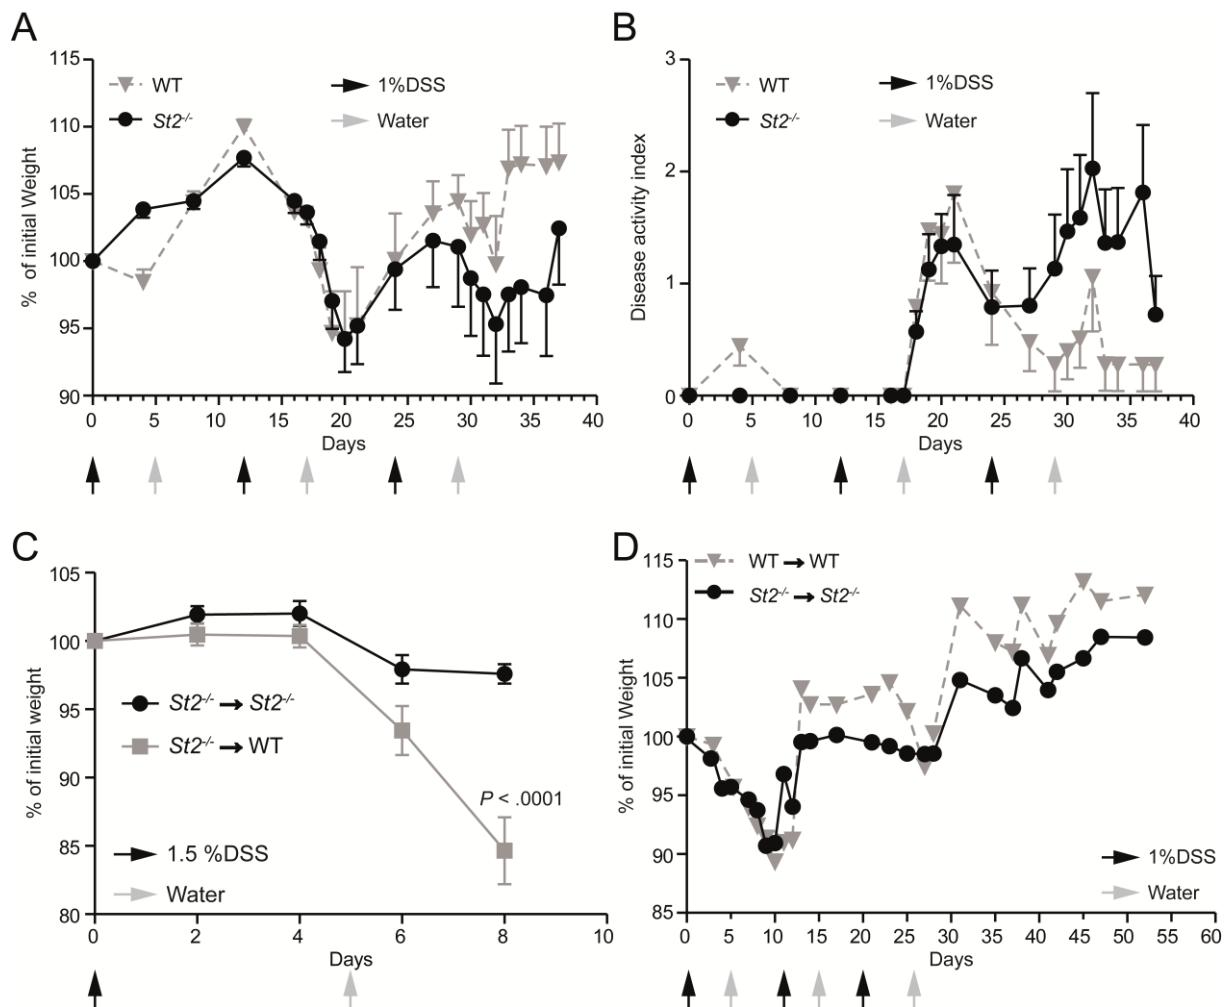

177

178

179 Disruption of IL-33/ST2 signaling delays the kinetics of the clinical symptoms associated  
 180 with DSS/water treatment. (A) *St2*<sup>-/-</sup> and WT mice previously injected with AOM were given  
 181 three cycles of DSS/water at the indicated frequency and variation in body weight and (B)  
 182 disease activity index were recorded;  $n=9$  samples per group. (C) and (D) Indicated sets of  
 183 BM chimeric mice given DSS/water at the indicated frequency and variation in body weight  
 184 was recorded. In (C),  $n=6-10$  samples per group. In (D), mice were previously injected with  
 185 AOM and  $n=8-9$  samples per group. Data represent means  $\pm$  SEM. Statistical analyses were  
 186 performed using a two-way ANOVA with a Bonferroni post-test.



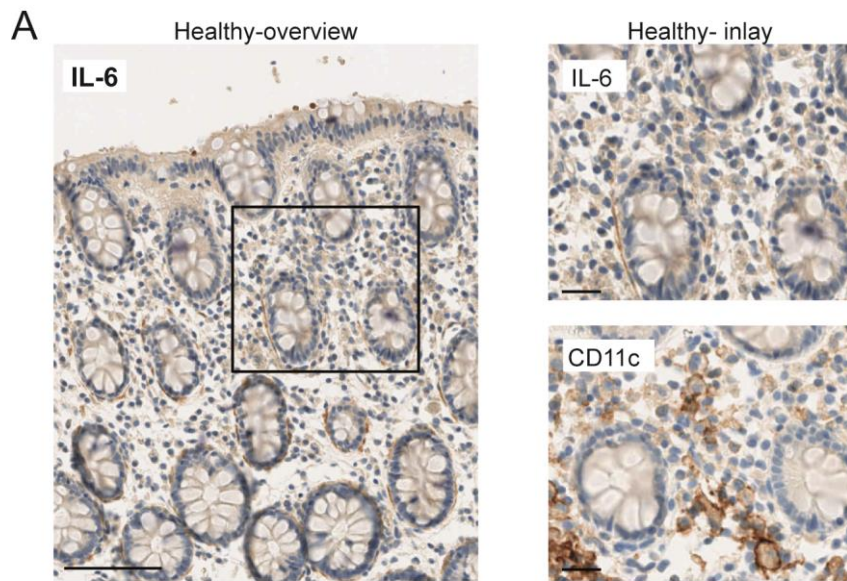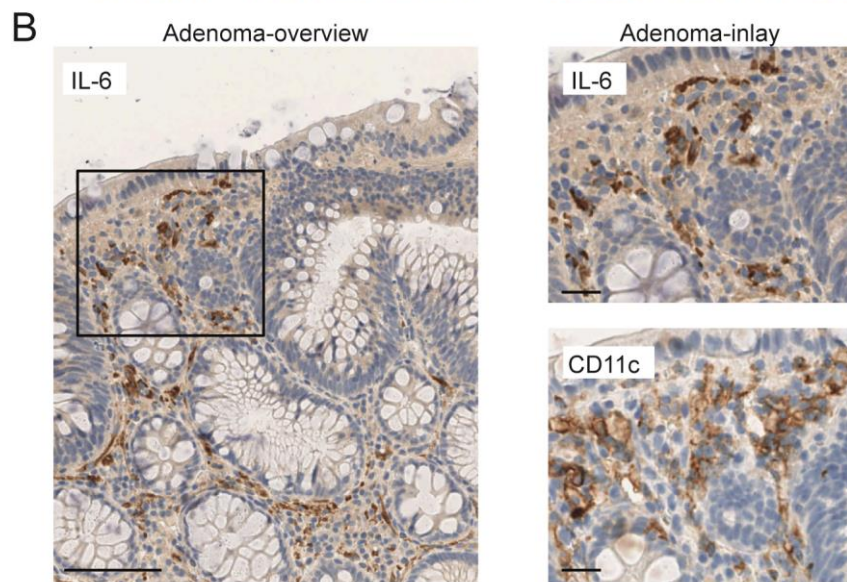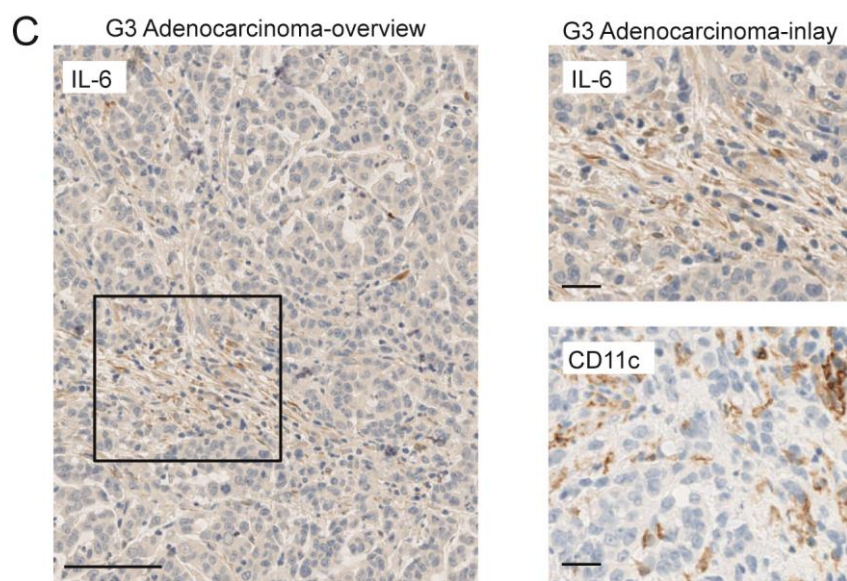



189

190 Serial sections of human colon were stained for IL-6 or CD11c. (A) Healthy mucosa. (B)

191 Adenoma. (C) High-grade adenocarcinoma. Scale bars: representative overview 100  $\mu\text{m}$ ;

192 inlay 25  $\mu\text{m}$ .

193

194 **Supplementary Figure 10**

195

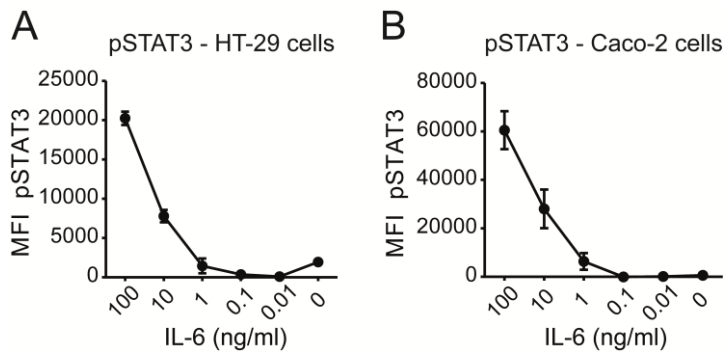

196

197

198 IL-6 induced STAT3 phosphorylation in (A) HT-29 and (B) Caco-2 cells in a dose-dependent

199 manner. Data represent means of experimental triplicates  $\pm$  SEM.

200

201 **Supplementary Table 1: Association of clinicopathological features and ST2/IL-33**  
 202 **combinations**  
 203

| Feature                                        | ST2/IL-33 combinations          |                                |                                  |                                 | P-value |
|------------------------------------------------|---------------------------------|--------------------------------|----------------------------------|---------------------------------|---------|
|                                                | Low/Low<br><i>n</i> =231; 50.6% | Low/High<br><i>n</i> =22; 4.8% | High/Low<br><i>n</i> =168; 36.8% | High/High<br><i>n</i> =36; 7.9% |         |
| Patient age ( <i>n</i> =457)<br>Median (range) | 76 (29-100)                     | 70 (46-88)                     | 76 (15-98)                       | 75 (40-90)                      | 0.1636  |
| Gender ( <i>n</i> =457)                        |                                 |                                |                                  |                                 |         |
| Male                                           | 134 (58.0)                      | 12 (54.6)                      | 98 (58.3)                        | 15 (41.7)                       | 0.2959  |
| Female                                         | 97 (42.0)                       | 10 (45.5)                      | 70 (41.7)                        | 21 (58.3)                       |         |
| Tumor location ( <i>n</i> =447)                |                                 |                                |                                  |                                 |         |
| Left                                           | 89 (39.0)                       | 6 (28.6)                       | 81 (49.7)                        | 19 (54.3)                       | 0.0604  |
| Rectum                                         | 14 (6.1)                        | 1 (4.8)                        | 15 (9.2)                         | 1 (2.9)                         |         |
| Right                                          | 125 (54.8)                      | 14 (66.7)                      | 67 (41.1)                        | 15 (42.9)                       |         |
| pT ( <i>n</i> =457)                            |                                 |                                |                                  |                                 |         |
| pT1-2                                          | 32 (13.9)                       | 3 (13.6)                       | 20 (11.9)                        | 12 (33.3)                       | 0.0107  |
| pT3-4                                          | 199 (86.2)                      | 19 (86.4)                      | 148 (88.1)                       | 24 (66.7)                       |         |
| pN ( <i>n</i> =454)                            |                                 |                                |                                  |                                 |         |
| pN0                                            | 119 (51.7)                      | 9 (40.9)                       | 102 (61.5)                       | 27 (75.0)                       | 0.0119  |
| pN1-2                                          | 111 (48.3)                      | 13 (59.1)                      | 64 (38.6)                        | 9 (25.0)                        |         |
| pM ( <i>n</i> =456)                            |                                 |                                |                                  |                                 |         |
| pM0                                            | 200 (86.6)                      | 17 (77.3)                      | 143 (85.1)                       | 30 (85.7)                       | 0.6959  |
| pM1                                            | 31 (13.4)                       | 5 (22.7)                       | 25 (14.9)                        | 5 (14.3)                        |         |
| UICC Stage ( <i>n</i> =454)                    |                                 |                                |                                  |                                 |         |
| I                                              | 21 (9.1)                        | 2 (9.1)                        | 18 (10.8)                        | 11 (30.6)                       | 0.0023  |
| II                                             | 88 (38.3)                       | 6 (27.3)                       | 78 (47.0)                        | 15 (41.7)                       |         |
| III                                            | 90 (39.1)                       | 9 (40.9)                       | 45 (27.1)                        | 5 (13.9)                        |         |
| IV                                             | 31 (13.5)                       | 5 (22.7)                       | 25 (15.1)                        | 5 (13.9)                        |         |
| Tumor grade ( <i>n</i> =452)                   |                                 |                                |                                  |                                 |         |
| G1-2                                           | 158 (69.3)                      | 17 (77.3)                      | 135 (81.3)                       | 31 (86.1)                       | 0.0186  |
| G3                                             | 70 (30.7)                       | 5 (22.7)                       | 31 (18.7)                        | 5 (13.9)                        |         |
| Lymphatic invasion ( <i>n</i> =406)            |                                 |                                |                                  |                                 |         |
| L0                                             | 161 (84.7)                      | 20 (90.9)                      | 141 (89.2)                       | 33 (91.7)                       | 0.4651  |
| L1                                             | 29 (15.3)                       | 2 (9.1)                        | 17 (10.8)                        | 3 (8.3)                         |         |
| Venous invasion ( <i>n</i> =417)               |                                 |                                |                                  |                                 |         |
| V0                                             | 149 (75.6)                      | 20 (90.9)                      | 134 (82.7)                       | 34 (94.4)                       | 0.0228  |
| V1-2                                           | 48 (24.4)                       | 2 (9.1)                        | 28 (17.3)                        | 2 (5.6)                         |         |
| Adjuvant therapy ( <i>n</i> =291)              |                                 |                                |                                  |                                 |         |
| None                                           | 88 (68.8)                       | 11 (57.9)                      | 85 (71.4)                        | 20 (80.0)                       | 0.435   |
| Treated                                        | 40 (31.3)                       | 8 (42.1)                       | 34 (28.6)                        | 5 (20.0)                        |         |
| Overall survival (%) ( <i>n</i> =272)          |                                 |                                |                                  |                                 |         |
| Median (95%CI)                                 | 66.0 (34-n.e.)                  | 61 (3-n.e.)                    | 50 (38-n.e.)                     | n.e.                            | 0.6634  |

n.e., not evaluable

204

205 **Supplementary Table 2: Patient characteristics**

206

| Patient cohort                                                  | Zurich           | Liestal           |
|-----------------------------------------------------------------|------------------|-------------------|
| Characteristic                                                  | Total            | Total             |
| Patient age at surgical resection <sup>1</sup><br>(year, range) | 70/73<br>(21-95) | 73/76<br>(15-100) |
| Observation period <sup>1</sup> (months, range)                 | 28/21<br>(2-95)  | 38/28<br>(4-151)  |
| Gender (%)                                                      |                  |                   |
| Male                                                            | 124 (49)         | 266 (56)          |
| Female                                                          | 129 (51)         | 205 (44)          |
| Tumor location (%)                                              |                  |                   |
| Left                                                            | 106 (51)         | 219 (49)          |
| Rectum                                                          | 80 (38)          | 196 (44)          |
| Right                                                           | 23 (11)          | 32 (7)            |
| pT (%)                                                          |                  |                   |
| pT1-2                                                           | 47 (19)          | 71 (15)           |
| pT3-4                                                           | 204 (81)         | 400 (85)          |
| pN (%)                                                          |                  |                   |
| pN0                                                             | 126 (50)         | 264 (57)          |
| pN1-2                                                           | 125 (50)         | 202 (43)          |
| pM (%)                                                          |                  |                   |
| pM0                                                             | 6 (12)           | 402 (85)          |
| pM1                                                             | 43 (88)          | 69 (15)           |
| UICC stage (%)                                                  |                  |                   |
| 0                                                               | 2 (1)            | 0 (0)             |
| I                                                               | 34 (13)          | 54 (12)           |
| II                                                              | 88 (35)          | 190 (40)          |
| III                                                             | 86 (34)          | 154 (33)          |
| IV                                                              | 43 (17)          | 69 (15)           |
| Grade (%)                                                       |                  |                   |
| G1-G2                                                           | 189 (75)         | 349 (77)          |
| G3                                                              | 62 (25)          | 101 (22)          |
| Lymphatic invasion (%)                                          |                  |                   |
| L0                                                              | n.a.             | 365 (87)          |
| L1                                                              | n.a.             | 54 (13)           |
| Venous invasion (%)                                             |                  |                   |
| V0                                                              | 17 (34)          | 347 (81)          |
| V1                                                              | 33 (66)          | 83 (19)           |
| V2                                                              | 1 (2)            | 4 (1)             |
| Adjuvant therapy (%)                                            |                  |                   |
| None                                                            | n.a.             | 207 (69)          |
| Treated                                                         | n.a.             | 93 (31)           |
| Overall survival (%)                                            |                  |                   |
| Median (95%CI)                                                  | 62 (50-73)       | 87 (77-97)        |

<sup>1</sup> Data are presented as mean / median values, n.a., information not available

207
